# Supplementary material
Source: publisher figshare collection journal article supplement (https://acs.figshare.com/ndownloader/files/14105537)
Supplement: Supplementary file 1 [file 14105537]

# **Optoelectronic properties of $\text{TiS}_2$ : a never ended story tackled by density functional theory and many body methods**

Adrien Stoliaroff, Stéphane Jobic, Camille Latouche\*

\*camille.latouche@cnrs-imn.fr

Institut des matériaux Jean Rouxel – Université de Nantes, CNRS, 2 rue de la Houssinière, BP 32229, 44322 Nantes Cedex 3, France

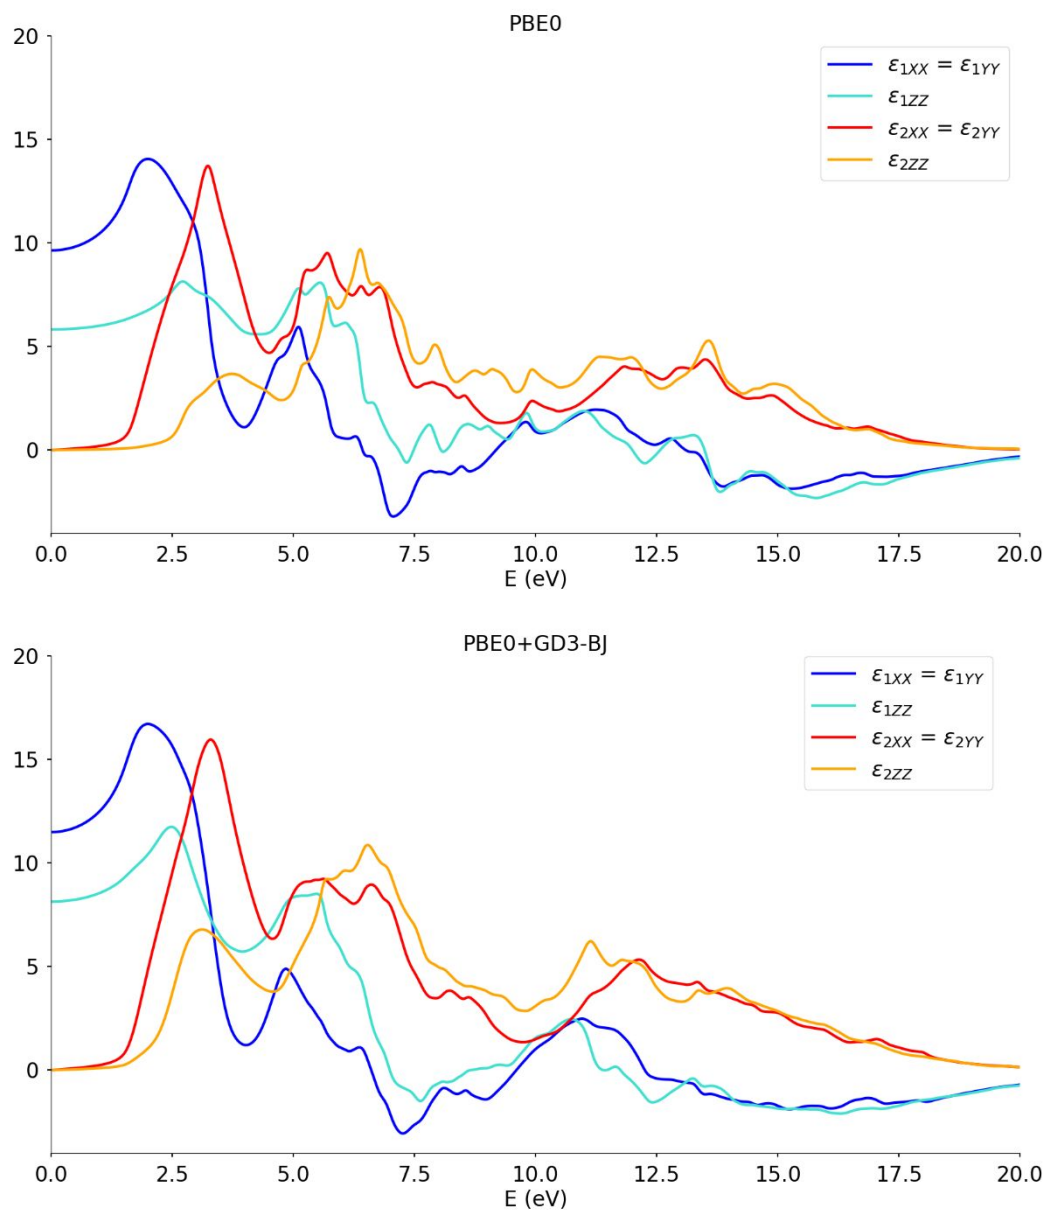

**Figure S1.** Simulated  $\epsilon_1$ ,  $\epsilon_2$  optical indices enforcing PBE0 and PBE0-D levels of theory.

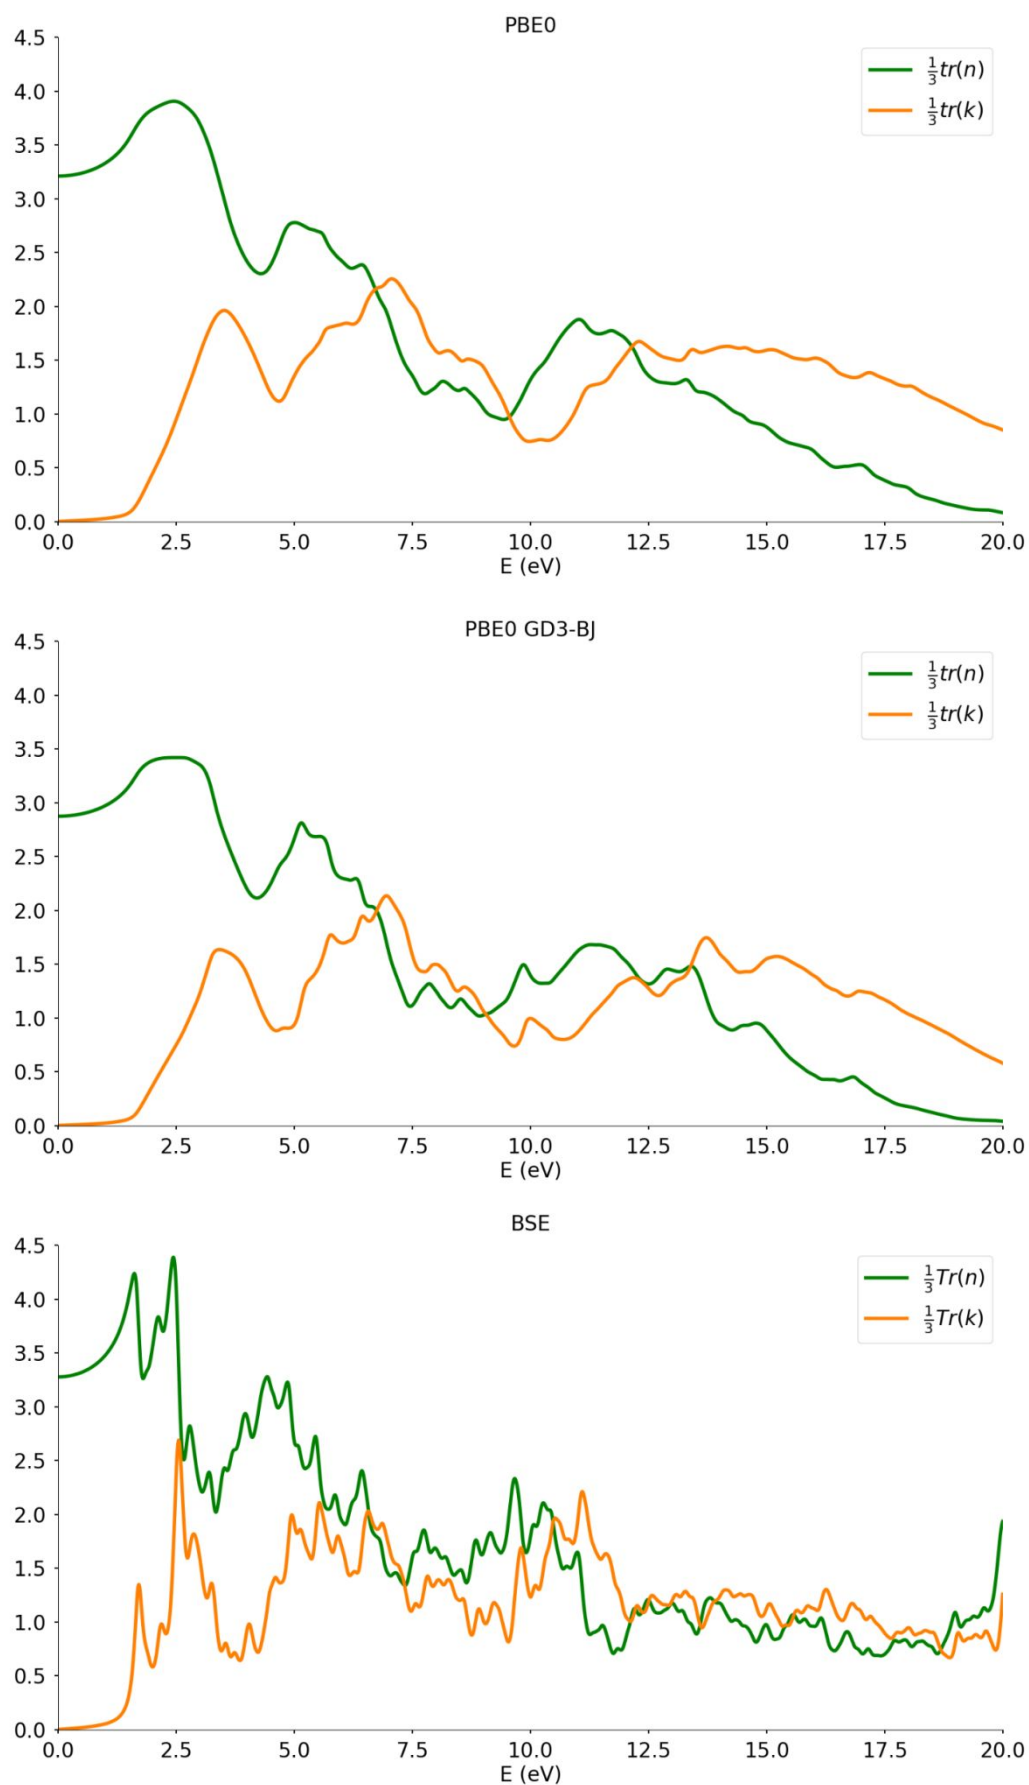

**Figure S2.** Simulated  $n, k$  optical indices enforcing PBE0, PBE0-D and BSE levels of theory.

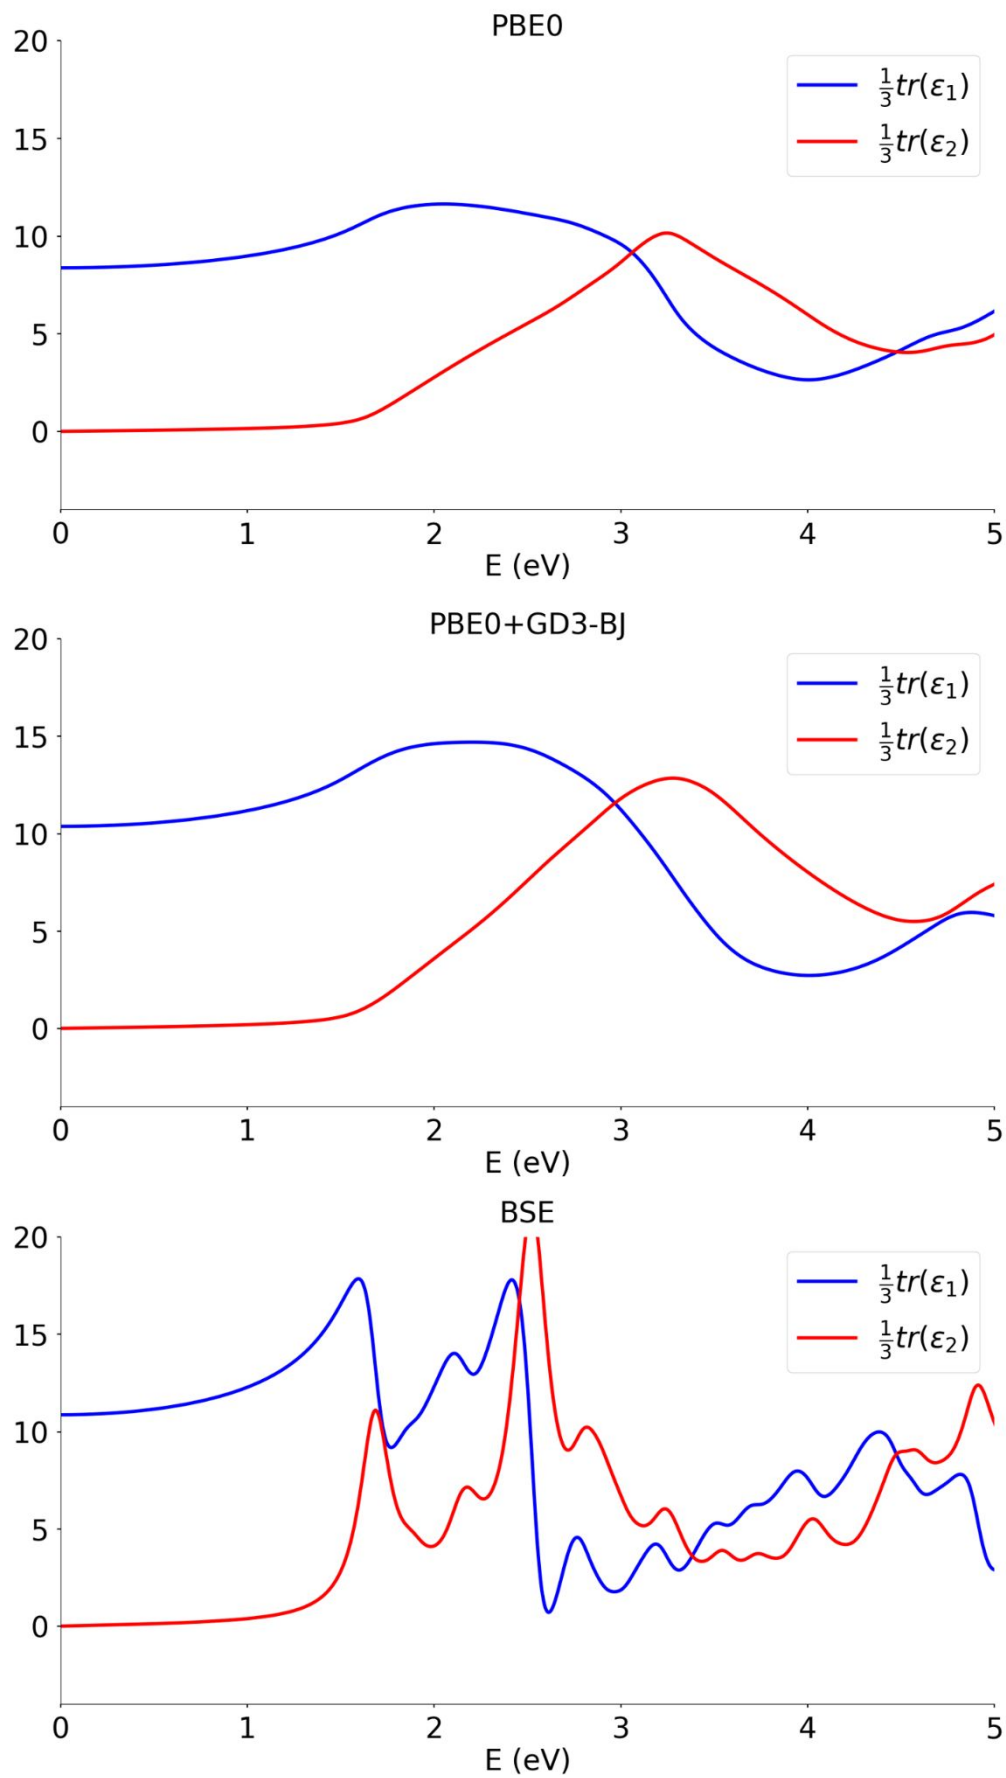

**S3.** Simulated  $\epsilon_1$ ,  $\epsilon_2$  optical indices enforcing PBE0, PBE0-D and BSE levels of theory.

**Figure**

In this case, as  $\varepsilon_{xx} = \varepsilon_{yy}$ ,  $\frac{1}{3}\text{tr}(\varepsilon) = \varepsilon_{iso} = \frac{2}{3}\varepsilon_{xx} + \frac{1}{3}\varepsilon_{zz}$ .
